# Supplementary material for: Perspectives of Polymers in Forensic Analysis
Source: MDPI journal article supplement (doi:10.3390/macromol3020008), 2023-04-10
Supplement: s1 [file s1]

Archive with 1 entries (1 files):
- macromol-1889639-supplementary.pdf
